# Supplementary material for: Protein-Bound Uremic Toxins Lowering Effect of Sevelamer in Pre-Dialysis Chronic Kidney Disease Patients with Hyperphosphatemia: A Randomized Controlled Trial
Source: MDPI journal article supplement (doi:10.3390/toxins13100688), 2021-09-27
Supplement: s1 [file s1]

Supplementary Information

# Protein-bound Uremic Toxins Lowering Effect of Sevelamer in Pre-dialysis Chronic Kidney Disease Patients with Hyperphosphatemia: A Randomized Controlled Trial

Table S1. Data collection.

|                                     | Screening | Baseline | 6 weeks | 12 weeks | 24 weeks |
|-------------------------------------|-----------|----------|---------|----------|----------|
| Inclusion and Exclusion criteria    | ✓         |          |         |          |          |
| Demographic data                    | ✓         |          |         |          |          |
| Cause of chronic kidney disease     | ✓         |          |         |          |          |
| Underlying disease                  | ✓         |          |         |          |          |
| Laboratory data                     | ✓         | ✓        | ✓       | ✓        | ✓        |
| 24-hour urine                       | ✓         | ✓        | ✓       | ✓        | ✓        |
| p-cresyl sulfate                    |           | ✓        |         | ✓        | ✓        |
| Indoxyl sulfate                     |           | ✓        |         | ✓        | ✓        |
| Fibroblast growth factor 23         |           | ✓        |         | ✓        | ✓        |
| High sensitivity C reactive protein |           | ✓        |         | ✓        | ✓        |
| Lipid profiles                      |           | ✓        |         | ✓        | ✓        |
| Parathyroid hormone                 |           | ✓        |         | ✓        | ✓        |
| Cardio-ankle vascular index         |           | ✓        |         |          | ✓        |
| Echocardiography                    |           | ✓        |         |          |          |
| Renal replacement therapy status    |           | ✓        | ✓       | ✓        | ✓        |
| Cardiovascular event                |           | ✓        | ✓       | ✓        | ✓        |
| Dead or alive status                |           | ✓        | ✓       | ✓        | ✓        |
| Adverse events                      |           | ✓        | ✓       | ✓        | ✓        |
